# Supplementary material for: Critical roles of nardilysin in the maintenance of body temperature homoeostasis
Source: PubMed Central journal article supplement — Nat Commun. 2014 Feb 4;5:3224. doi: 10.1038/ncomms4224 (PMC3926010; doi:10.1038/ncomms4224), 2014-02-04
Supplement: ncomms4224-s1.pdf [file ncomms4224-s1.pdf]

## **Supplementary Information**

### **Critical roles of nardilysin in the maintenance of body temperature homeostasis**

**Yoshinori Hiraoka, Tatsuhiko Matsuoka, Mikiko Ohno, Kazuhiro Nakamura, Sayaka Saijo, Shigenobu Matsumura, Kiyoto Nishi, Jiro Sakamoto, Po-Min Chen, Kazuo Inoue, Tohru Fushiki, Toru Kita, Takeshi Kimura & Eiichiro Nishi**

**Supplementary Figures 1-9**

**Supplementary Tables 1-2**

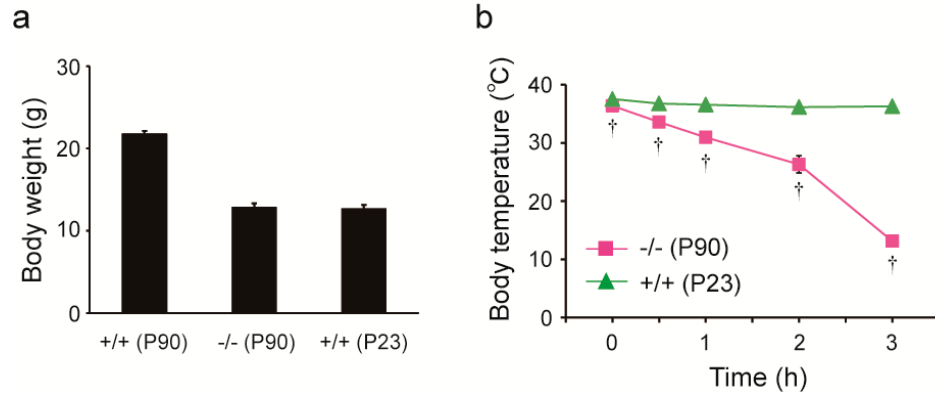

**Supplementary Figure 1. Cold-tolerance of younger *Nrd1*<sup>+/+</sup> mice with similar body size as *Nrd1*<sup>-/-</sup> mice (P90).** (a) Average of body weight of *Nrd1*<sup>+/+</sup> (P23 and P90) and *Nrd1*<sup>-/-</sup> (P90) mice. (b) *Nrd1*<sup>+/+</sup> mice (P23), which have the similar body weight as P90 *Nrd1*<sup>-/-</sup> mice, kept their body temperature during 3 hours-cold exposure. n = 6 per genotype. All data represent means ± s.e.m. †*P* < 0.0001.

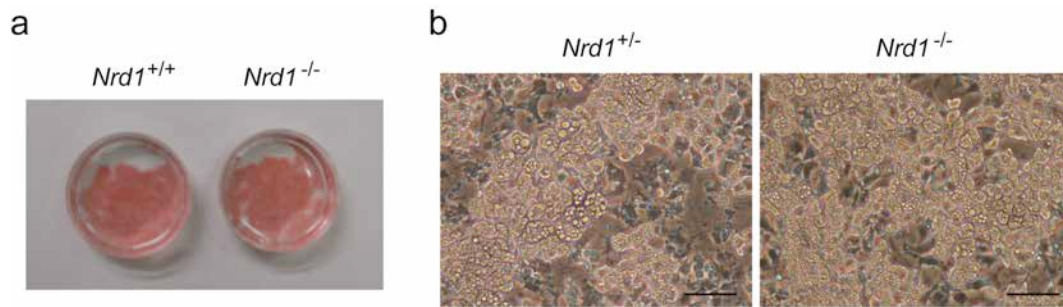

**Supplementary Figure 2. NRDC has no effect on adipogenic differentiation..** (a) Brown preadipocytes derived from neonatal *Nrd1*<sup>+/+</sup> and *Nrd1*<sup>-/-</sup> BAT were differentiated for 8 days and stained with oil red O. (b) Brown preadipocyte derived from neonatal *Nrd1*<sup>+/-</sup> and *Nrd1*<sup>-/-</sup> BAT were immortalized by stable introduction of large T antigen. Those cells were differentiated for 6 days and observed by phase contrast microscopy. Scale bars represent 20  $\mu$ m.

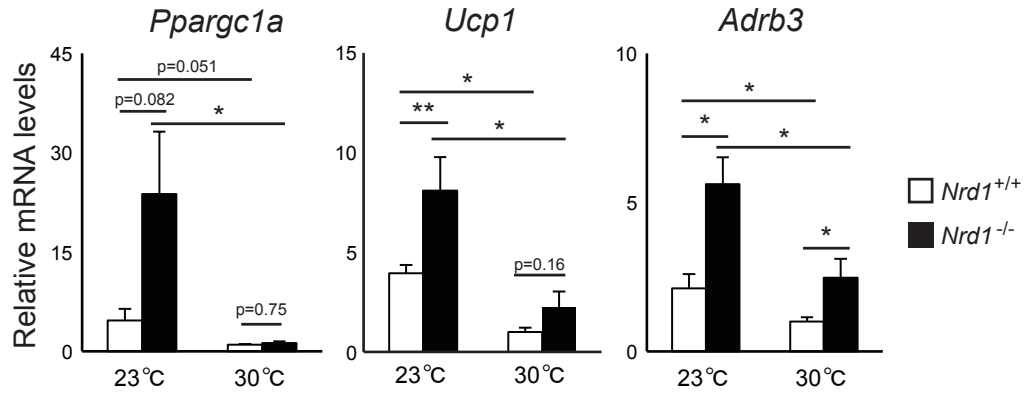

**Supplementary Figure 3. Expression of thermogenic genes at different ambient temperature.** Quantitative reverse transcription PCR (qRT-PCR) analysis for thermogenic genes in BAT from 6-month-old *Nrd1*<sup>+/+</sup> and *Nrd1*<sup>-/-</sup> mice housed at 23 °C or 30 °C for 10 days. The mRNA level is normalized by  $\beta$ -actin mRNA, and the level is arbitrarily set at 1 in *Nrd1*<sup>+/+</sup> BAT at 30 °C. n = 6 per genotype. All data represent means  $\pm$  s.e.m. \* $P < 0.05$ , \*\* $P < 0.001$ , n.s.; not significant.

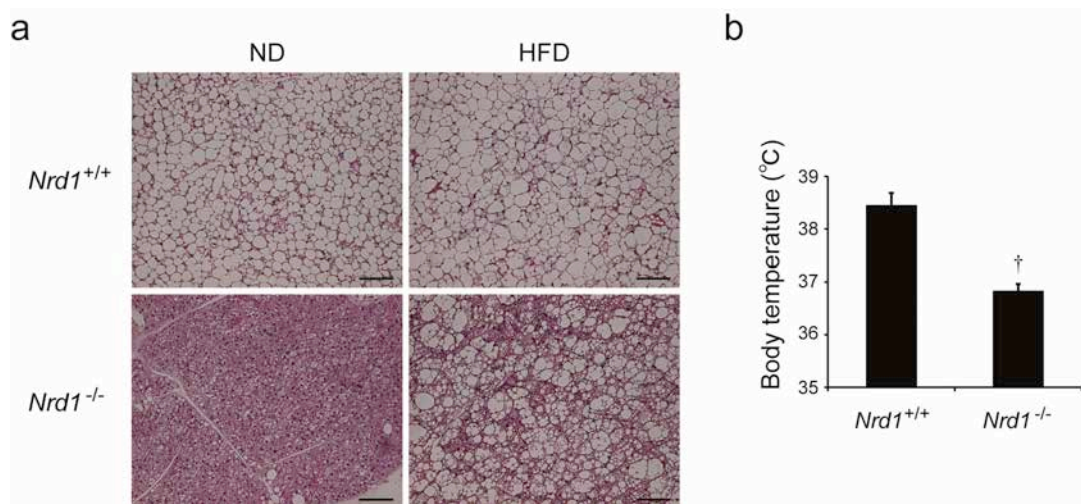

**Supplementary Figure 4. Increased lipid accumulation in BAT of *Nrd1*<sup>-/-</sup> mice fed a high fat diet.** (a) Haematoxylin and eosin stained sections of BAT from 6-month-old *Nrd1*<sup>+/+</sup> and *Nrd1*<sup>-/-</sup> mice fed a normal diet (ND) or a high fat diet (HFD). Scale bars represent 250  $\mu$ m. (b) Body temperature of 6-month-old *Nrd1*<sup>+/+</sup> and *Nrd1*<sup>-/-</sup> mice fed a HFD at room temperature. n = 6 per genotype. All data represent means  $\pm$  s.e.m. †*P* < 0.0001.

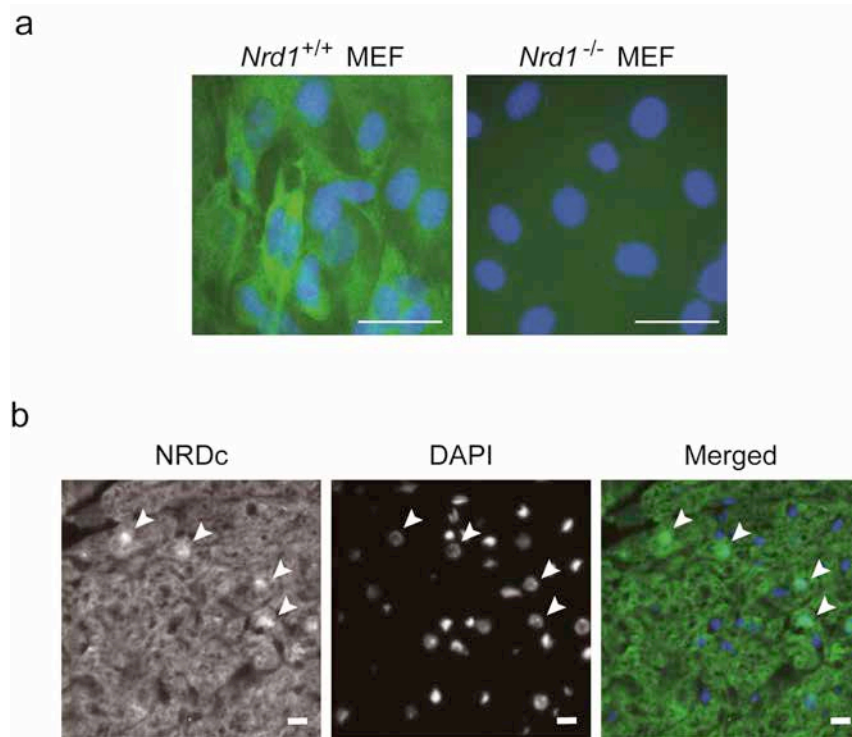

**Supplementary Figure 5. Immunostaining analysis of mouse embryonic fibroblast (MEF) or BAT.** (a) MEF derived from *Nrd1*<sup>+/+</sup> and *Nrd1*<sup>-/-</sup> mice were fixed with 4% paraformaldehyde (PFA, wt/vol) and immunostained with anti-mouse NRDc antibody, established in our laboratory. Note that no staining was detected in *Nrd1*<sup>-/-</sup> MEF. Scale bars represent 50  $\mu$ m. (b) Immunohistochemical analysis of BAT with anti-NRDc antibody. Sections of *Nrd1*<sup>+/+</sup> BAT were immunostained with anti-NRDc antibody and counterstained with DAPI. Arrowheads indicate the nuclear expression of NRDc. Scale bars represent 50  $\mu$ m.

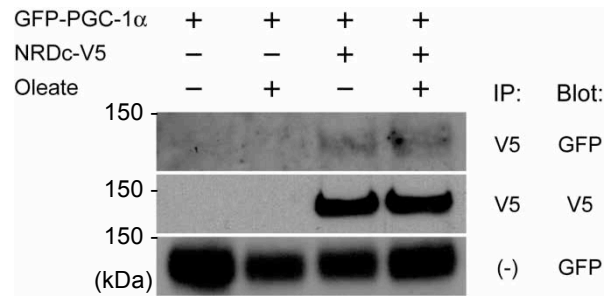

**Supplementary Figure 6. Association of NRDc and PGC-1 $\alpha$  shown by co-immunoprecipitation experiments.** COS7 cells were transfected with the indicated expression vectors, followed by the treatment with or without oleate for 24 h. Immunoprecipitation with anti-V5 (NRDc) antibody revealed a complex of NRDc and PGC-1 $\alpha$ . Twenty % of input was blotted with anti-GFP (PGC-1 $\alpha$ ) in the bottom lane.

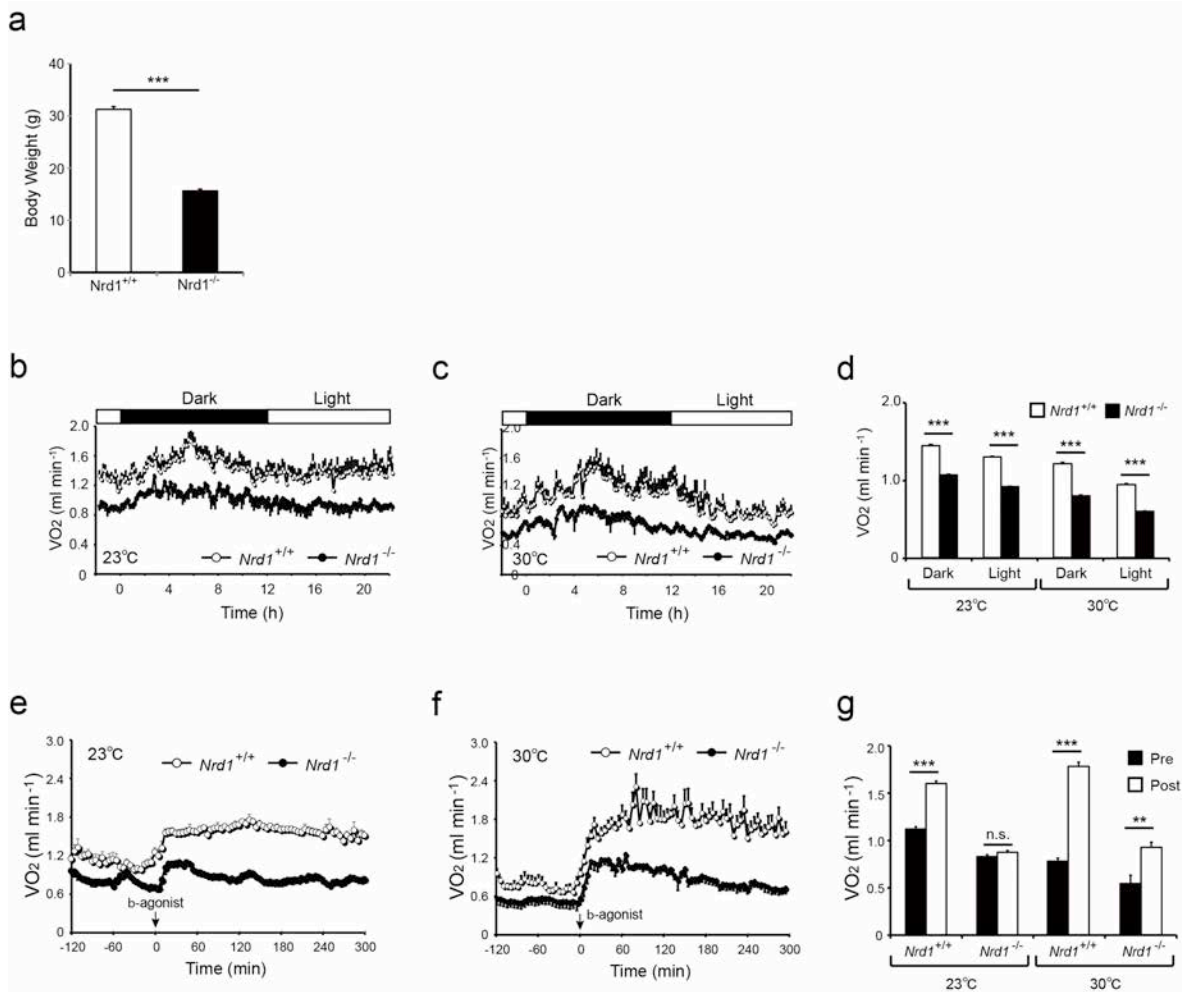

**Supplementary Figure 7. Oxygen consumption per animal at different ambient temperature.** (a) Average of body weight of *Nrd1*<sup>+/+</sup> and *Nrd1*<sup>-/-</sup> (P180) mice. n = 6 per genotype. (b,c) Oxygen consumption per animal of *Nrd1*<sup>+/+</sup> and *Nrd1*<sup>-/-</sup> mice were monitored at 23 °C (b) or 30 °C (c). n = 6 per genotype and temperature. (d) The average oxygen consumption per animal during dark and light period of *Nrd1*<sup>+/+</sup> and *Nrd1*<sup>-/-</sup> mice housed at 23 °C or 30 °C. n = 6 per genotype and temperature. (e,f) Oxygen consumption per animal induced by  $\beta$ 3-agonist (BRL37344: 5 mg kg<sup>-1</sup>) in *Nrd1*<sup>+/+</sup> and *Nrd1*<sup>-/-</sup> mice



housed at 23 °C (e) or 30 °C (f). n = 6 per genotype and temperature. (g) The average oxygen consumption per animal of *Nrdl*<sup>+/+</sup> and *Nrdl*<sup>-/-</sup> mice before (Pre) and after (Post)  $\beta$ 3-agonist injection at 23 °C or 30 °C. n = 6 per genotype and temperature. All data represent means  $\pm$  s.e.m. \*\**P* < 0.005, \*\*\**P* < 0.001, n.s.; not significant (two-tailed Student's *t*-test).

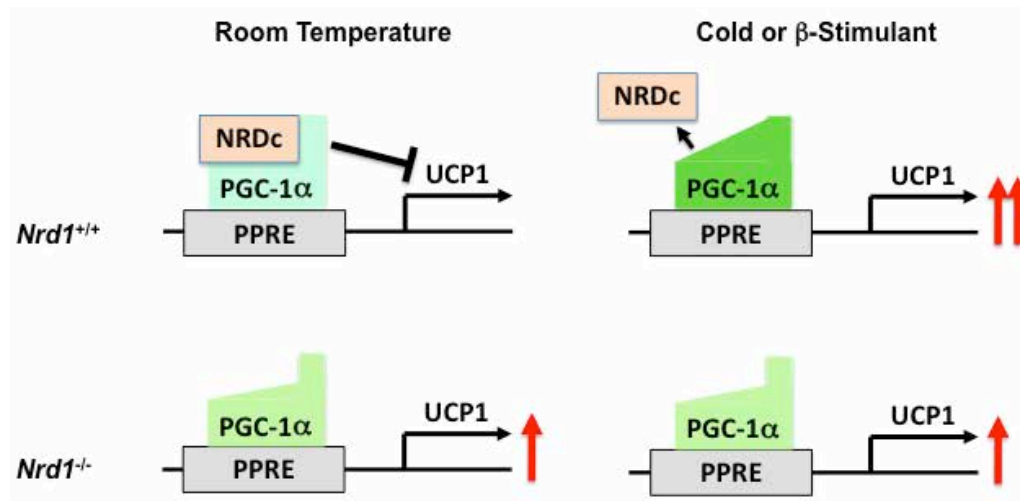

**Supplementary Figure 8. Role of NRDC in the derepression of PGC-1 $\alpha$  activity.** NRDC represses PGC-1 $\alpha$  activity and UCP1 transcription by binding directly to PGC-1 $\alpha$ . Upon activation, removal of NRDC from the complex derepresses the coactivator function of PGC-1 $\alpha$ , allowing it to activate UCP1 transcription (Upper panel). In the absence of NRDC, the basal levels of PGC-1 $\alpha$  and UCP1 activation are upregulated. However, further activation of those genes by  $\beta$ -stimulant is impaired without the derepression process by NRDC (Lower panel).

Full blots for Figure-6b

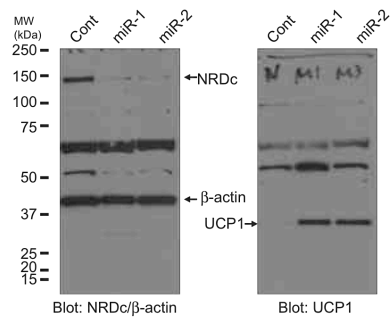

Full blots for Figure-7a

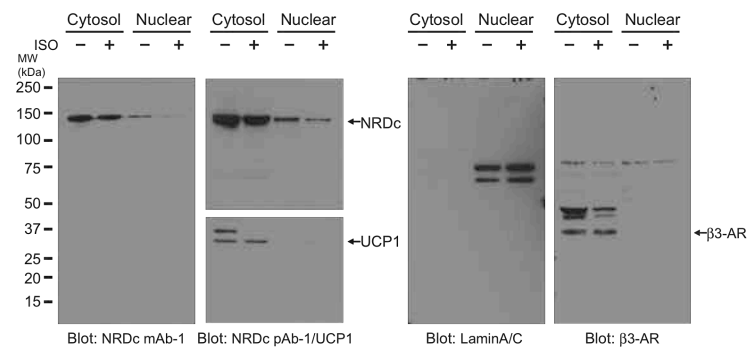

Full blots for Figure-8a

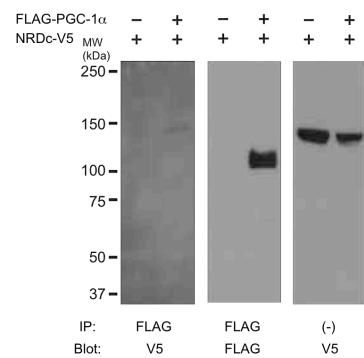

Full blots for Figure-8b

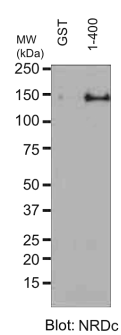

Full blots for Figure-8d

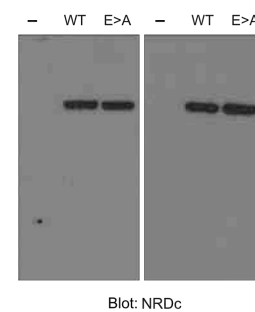

Supplementary Figure 9. Full blots of Figures presented in the main paper.

|                               | <i>Nrd1</i> <sup>+/+</sup> | <i>Nrd1</i> <sup>-/-</sup> | Unpaired <i>t</i> -test |
|-------------------------------|----------------------------|----------------------------|-------------------------|
| $\Delta T_{\text{skin}}$ (°C) | -10.0 ± 1.7                | -11.1 ± 1.9                | n.s.                    |
| $\Delta T_{\text{BAT}}$ (°C)  | 0.6 ± 0.1                  | -0.2 ± 0.1                 | P < 0.001               |
| $\Delta \text{HR}$ (bpm)      | 39 ± 10                    | 33 ± 25                    | n.s.                    |
| $\Delta T_{\text{rec}}$ (°C)  | -1.9 ± 0.5                 | -2.0 ± 0.5                 | n.s.                    |
| $\Delta T_{\text{tail}}$ (°C) | -2.3 ± 0.5                 | -4.4 ± 0.7                 | n.s.                    |

n.s.; not significant

**Supplementary Table 1. Cooling-evoked changes in physiological variables (n=4 for *Nrd1*<sup>+/+</sup>, n=7 for *Nrd1*<sup>-/-</sup> mice, mean ± s.e.m.)**

| Gene            | Forward (5' -> 3')          | Reverse (5' -> 3')        |
|-----------------|-----------------------------|---------------------------|
| <i>Nrd1</i>     | ATGGATGGCCTTTCCTTG          | CGCGAAGTTCAGCTTGCAA       |
| <i>Ppargc1a</i> | AGCCGTGACCACTGACAACGAG      | GCTGCATGGTTCTGAGTGCTAAG   |
| <i>Ucp1</i>     | GGCATTGAGAGGCAAATCAGCT      | CAATGAACACTGCCACACCTC     |
| <i>Adrb3</i>    | CCACTCCGGGAACACCG           | GGCAGTAGATGACCGGGTTG      |
| <i>Cpt1a</i>    | GGGCACCTCTGGGAGTTTGT        | TTGGCTCACCCACACAGTGT      |
| <i>Acadm</i>    | GCCAAGATCTATCAGATTTATGAAGGT | AGCTATGATCAGCCTCTGAATTTGT |
| <i>Acadv1</i>   | GCCAGGGCAGAATCGAAGT         | TGGTAAGCTGGCCTTTGAACAT    |
| <i>Pdk4</i>     | GCAGTAGTCCAAGATGCCTTTGA     | AATACTGGTCGCAGAGCATCTTT   |
| <i>Acadl</i>    | CCCTCCGCCCGATGTT            | AAGGAGTTTCTAGACGCGCTTCT   |
| <i>Esrra</i>    | AGCAAGCCCCGATGGA            | GAGAGGCCTGGGATGCTCTT      |
| <i>Actb</i>     | CTGACTGACTACCTCATGAAGATCCT  | CTTAATGTACGCACGATTCC      |

**Supplementary Table 2. Primer sequences used for RT-PCR**
